# Supplementary material for: Medium-Entropy SrV1/3Fe1/3Mo1/3O3 with High Conductivity and Strong Stability as SOFCs High-Performance Anode
Source: MDPI journal article supplement (doi:10.3390/ma15062298), 2022-03-20
Supplement: s1 [file s1]

# Medium-Entropy $\text{SrV}_{1/3}\text{Fe}_{1/3}\text{Mo}_{1/3}\text{O}_3$ with High Conductivity and Strong Stability as SOFCs High-Performance Anode

Guanjun Ma, Dezhi Chen, Shuaijing Ji, Xinyun Bai, Xinjian Wang, Yu Huan,\* Dehua Dong, Xun Hu and Tao Wei\*

School of Materials Science and Engineering, University of Jinan, Jinan 250022, China;  
maguanjun\_ujn@163.com (G.M.); 15039772831@163.com (D.C.); jishuaijing\_ujn@163.com (S.J.);  
woderfulgirly2002@163.com (X.B.); wangxinjian\_ujn@163.com (X.W.); mse\_dongdh@ujn.edu.cn (D.D.);  
huxun20032004@126.com (X.H.)

\* Correspondence: mse\_huany@ujn.edu.cn (Y.H.); mse\_weit@ujn.edu.cn (T.W.)

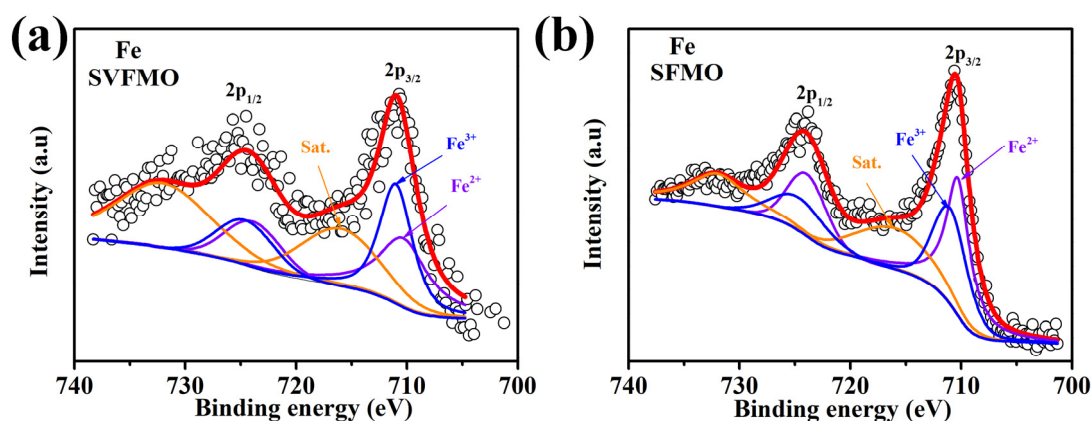

Figure S1. XPS of Fe 2p for SVFMO and SFMO anode.

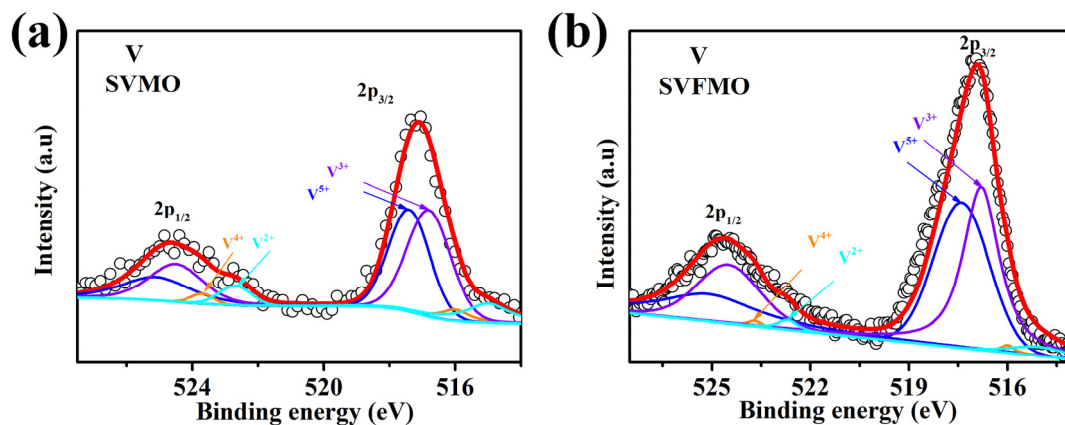

Figure S2. XPS of V 2p for SVMO and SVFMO anode.

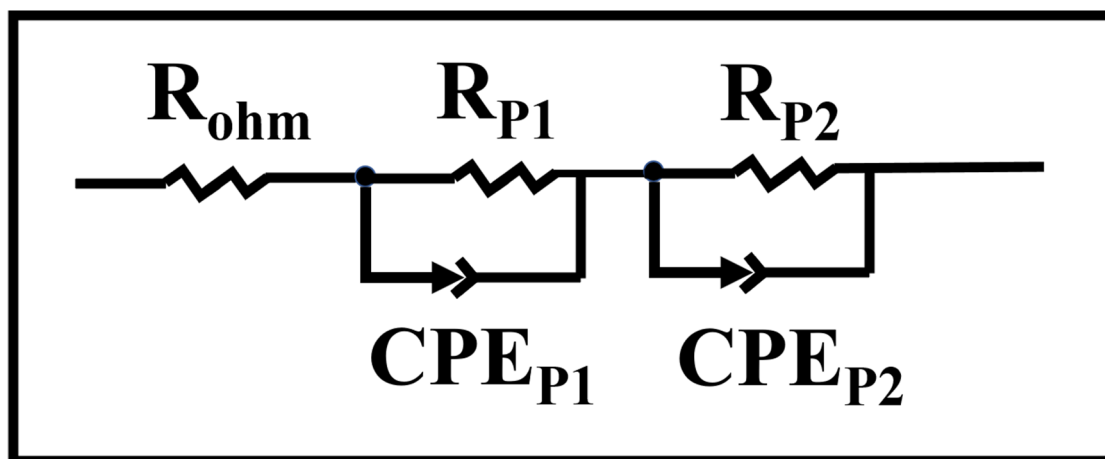

**Figure S3.** The equivalent circuit for the fitting EIS of symmetric cells (testing at 850).
